# Supplementary material for: Chemokine-coupled β2 integrin–induced macrophage Rac2–Myosin IIA interaction regulates VEGF-A mRNA stability and arteriogenesis
Source: PubMed Central journal article supplement — J Exp Med. 2014 Sep 22;211(10):1957–68. doi: 10.1084/jem.20132130 (PMC4172219; doi:10.1084/jem.20132130), 2014-09-22
Supplement: supp_jem.20132130_JEM_20132130_sm.pdf [file supp_jem.20132130_JEM_20132130_sm.pdf]

## SUPPLEMENTAL MATERIAL

Morrison et al., <http://www.jem.org/cgi/content/full/jem.20132130/DC1>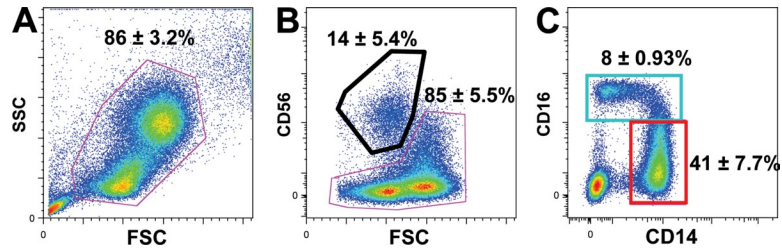

**Figure S1. Flow cytometric serial selection, identification, and subsequent separation (sorting) of human peripheral blood inflammatory versus patrolling monocytes.** (A) Side and forward scatter gating/selection of viable cells. (B) Identification (and exclusion) of CD56<sup>hi</sup> NK cells (black). (C) Identification (and selection/sorting) of CD56<sup>-</sup> CD16<sup>lo</sup> CD14<sup>hi</sup> inflammatory monocytes (red), and CD56<sup>-</sup> CD16<sup>hi</sup> CD14<sup>var</sup> atypical/patrolling monocytes (cyan). All quantitative data are displayed as mean  $\pm$  SEM ( $n = 4$ ). Data are from two independent experiments, each with two mice per treatment group.

| Score  | Peptide Sequence                                  | m/z       | Ion Mass  | Ion Mass(calc) | Delta   | Charge |
|--------|---------------------------------------------------|-----------|-----------|----------------|---------|--------|
| 144.12 | K.MQQNIQELEEQLLEEEESAR.Q + Oxidation (M)          | 1175.0284 | 2348.0422 | 2348.0437      | -0.0015 | 2      |
| 136.03 | K.LQVELDNVTGLLSQSDSK.S                            | 973.5078  | 1945.001  | 1945.0004      | 0.0006  | 2      |
| 132.99 | K.TQLEEELEDELQATEDAK.L                            | 981.4631  | 1960.9116 | 1960.9113      | 0.0003  | 2      |
| 118.38 | R.IAEFTTNLTETEEK.S                                | 827.3971  | 1652.7797 | 1652.7781      | 0.0017  | 2      |
| 117.65 | K.SMEAEMIQLEELAAER.A + 2 Oxidation (M)            | 1040.9784 | 2079.9422 | 2079.9452      | -0.003  | 2      |
| 117.42 | K.MQQNIQELEEQLLEEEESAR.Q                          | 1167.0299 | 2332.0452 | 2332.0488      | -0.0036 | 2      |
| 116.88 | R.IAQLEEELEEEQNGTELINDR.L                         | 1236.5882 | 2471.1618 | 2471.1663      | -0.0044 | 2      |
| 111.74 | K.TELEDTLDSAAQQLR.S                               | 960.4645  | 1918.9145 | 1918.912       | 0.0025  | 2      |
| 110.91 | K.KLEEEQIILEDQNCK.L + Propionamide (C)            | 951.9761  | 1901.9376 | 1901.9404      | -0.0028 | 2      |
| 108.36 | R.KKVEAQLQELQVK.F                                 | 770.9566  | 1539.8987 | 1539.8984      | 0.0003  | 2      |
| 102.99 | R.KLEGDSTLSDQIAELQAIAELK.M                        | 1308.172  | 2614.3294 | 2614.3337      | -0.0043 | 2      |
| 102.82 | K.SMEAEMIQLEELAAER.A + Oxidation (M)              | 1032.9812 | 2063.9478 | 2063.9503      | -0.0024 | 2      |
| 101.68 | R.NTDQASMPDNTAAQK.V                               | 796.3549  | 1590.6953 | 1590.6944      | 0.0009  | 2      |
| 100.5  | R.IAQLEEELEEEQNGTELINDR.L                         | 824.7298  | 2471.1676 | 2471.1663      | 0.0013  | 3      |
| 98.78  | R.QLLQANPILEAFGNAK.T                              | 863.9787  | 1725.9429 | 1725.9413      | 0.0015  | 2      |
| 97.24  | K.KVEAQLQELQVK.F                                  | 706.9091  | 1411.8037 | 1411.8035      | 0.0003  | 2      |
| 95.76  | K.DFSALESQQLDQTQELLQEENR.Q                        | 1247.088  | 2492.1614 | 2492.1667      | -0.0052 | 2      |
| 94.44  | K.EQADFAIEALAK.A                                  | 653.3375  | 1304.6604 | 1304.6612      | -0.0008 | 2      |
| 92.2   | R.LTEMETLQSQLMAEK.L + Oxidation (M)               | 884.4287  | 1766.8429 | 1766.843       | -0.0001 | 2      |
| 91.95  | R.LTEMETLQSQLMAEK.L + 2 Oxidation (M)             | 892.4258  | 1782.837  | 1782.8379      | -0.0009 | 2      |
| 91.62  | R.DELAIDEIANSSGK.G                                | 674.815   | 1347.6154 | 1347.6154      | 0.0001  | 2      |
| 91.55  | K.NLPIYSEIIVEMYK.G + Oxidation (M)                | 872.4291  | 1742.8437 | 1742.8436      | 0       | 2      |
| 91.03  | R.ELEDATETADAMNR.E                                | 783.341   | 1564.6674 | 1564.6675      | -0.0001 | 2      |
| 90.67  | K.HSQAVEELAEQLEQTK.R                              | 920.4575  | 1838.9005 | 1838.901       | -0.0005 | 2      |
| 90.4   | K.NMDPLNDNIATLLHQSSDK.F + Oxidation (M)           | 1071.5089 | 2141.0032 | 2141.0059      | -0.0026 | 2      |
| 89.2   | R.IMGIPPEEQMGLLR.V                                | 808.4124  | 1614.8102 | 1614.8109      | -0.0007 | 2      |
| 88.48  | K.RQLEEAEEEAQR.A                                  | 744.3575  | 1486.7004 | 1486.7011      | -0.0007 | 2      |
| 88.35  | K.ASITALEAK.I                                     | 452.2613  | 902.5081  | 902.5073       | 0.0008  | 2      |
| 88.14  | K.DFSALESQQLDQTQELLQEENR.Q                        | 831.7289  | 2492.165  | 2492.1667      | -0.0017 | 3      |
| 86.99  | K.LEEEQIILEDQNCK.L + Propionamide (C)             | 887.9299  | 1773.8453 | 1773.8454      | -0.0001 | 2      |
| 86.57  | K.EEVGEEAIVELVENGK.K                              | 872.4357  | 1742.8569 | 1742.8574      | -0.0005 | 2      |
| 86.22  | K.KANLQIDQINTDLNLER.S                             | 999.5342  | 1997.0539 | 1997.0541      | -0.0003 | 2      |
| 85.52  | R.NTDQASMPDNTAAQK.V + Oxidation (M)               | 804.3493  | 1606.6841 | 1606.6893      | -0.0052 | 2      |
| 82.6   | K.ANLQIDQINTDLNLER.S                              | 935.4889  | 1868.9633 | 1868.9592      | 0.0042  | 2      |
| 82.52  | K.NLPIYSEIIVEMYK.G                                | 864.4315  | 1726.8484 | 1726.8487      | -0.0003 | 2      |
| 82.3   | R.HEMPPHYAITDTAYR.S + Oxidation (M)               | 965.9584  | 1929.9022 | 1929.9043      | -0.0021 | 2      |
| 81.89  | R.IAEFTTNLTETEEK.S                                | 1653.7838 | 1652.7765 | 1652.7781      | -0.0016 | 1      |
| 81.18  | R.VISGVLQGNIVFK.K                                 | 743.954   | 1485.8935 | 1485.8919      | 0.0016  | 2      |
| 78.77  | R.LQQLDLDLVDLHDQR.Q                               | 975.4994  | 1948.9842 | 1948.9854      | -0.0012 | 2      |
| 78.03  | R.IAEFTTNLTETEEKSK.S                              | 934.9582  | 1867.9019 | 1867.9051      | -0.0032 | 2      |
| 76.91  | K.VIQYLAYVASSHK.S                                 | 739.9041  | 1477.7937 | 1477.7929      | 0.0008  | 2      |
| 76.86  | R.DELAIDEIANSSGK.G                                | 1348.6236 | 1347.6163 | 1347.6154      | 0.001   | 1      |
| 76.55  | K.SGFEPASLKEEVGEEAIVELVENGK.K                     | 1330.6655 | 2659.3164 | 2659.3228      | -0.0064 | 2      |
| 76.55  | R.ELEDATETADAMNR.E + Oxidation (M)                | 791.3387  | 1580.6628 | 1580.6624      | 0.0004  | 2      |
| 76.51  | K.VSHLLGINVDFTR.G                                 | 1571.8515 | 1570.8442 | 1570.8468      | -0.0025 | 1      |
| 76.42  | R.QLLQANPILEAFGNAK.T                              | 576.3211  | 1725.9416 | 1725.9413      | 0.0003  | 3      |
| 75.61  | R.RGDLPFVVR.R                                     | 578.3361  | 1154.6576 | 1154.656       | 0.0016  | 2      |
| 74.65  | R.EMAELEDER.K + Oxidation (M)                     | 1266.5139 | 1265.5066 | 1265.5081      | -0.0015 | 1      |
| 74.11  | R.ALEQQVEEMKTLQLEEELEDELQATEDAK.L + Oxidation (M) | 1055.1643 | 3162.4711 | 3162.4761      | -0.0051 | 3      |
| 73.54  | K.DMFQETMEAMR.I + 2 Oxidation (M)                 | 710.7807  | 1419.5468 | 1419.5469      | 0       | 2      |

**Figure S2. MH<sup>+</sup> ions detected in trypsin digests by LCMS.** THP-1 cells were stimulated with 50 ng/ml CCL2 for 10 min at 37°C, followed by lysis, GTP loading with 100 μM GTPγS for 10 min, affinity precipitation by PBD pull-down, and using Coomassie staining to identify Rac-associated bands. A 226 kD protein was in-gel trypsin-digested, and eluted peptides were run on LCMS by the Yale Keck Proteomic Core Facility. The table displays the peptide sequence, m/z, ion mass, and charge of top 50 (by score) Myh9 peptide species identified by mass spectrometry. Data are from two independent experiments, each with two treatment groups.
